# Supplementary material
Source: PubMed Central journal article supplement (PMC5819352)
Supplement: NIHMS934872-supplement-Supplemental_Material.pdf [file NIHMS934872-supplement-Supplemental_Material.pdf]

**Increasing Incidence and Prevalence of WHO Groups 1-4 Pulmonary Hypertension: A  
*Population-Based Cohort Study in Ontario, Canada.***

Thiwanka D Wijeratne MD, assistant professor<sup>1,2</sup>, Katherine Lajkosz MSc, research analyst<sup>2</sup>, Susan B. Brogly PhD, assistant professor<sup>2,3</sup>, M. Diane Lougheed MD, professor<sup>1,2,4</sup>, Li Jiang MSc, epidemiologist<sup>2</sup>, Ahmad Housin MD Medical resident<sup>1</sup>, David Barber MSc, research analyst<sup>1</sup>, Ana Johnson PhD, associate professor<sup>2,4</sup>, Katharine M Doliszny PhD, research assistant<sup>1</sup>, Stephen L Archer MD, professor<sup>1</sup>

<sup>1</sup>Department of Medicine, Queen's University, Kingston, Ontario, Canada

<sup>2</sup>Institute for Clinical Evaluative Sciences Queen's, Queen's University, Kingston, Ontario

<sup>3</sup>Department of Surgery, Queen's University, Kingston, Ontario, Canada

<sup>4</sup>Department of Public Health Sciences, Queen's University, Kingston, Ontario, Canada

**SUPPLEMENTAL MATERIAL**

## Table of Contents

|                                                                                                            |    |
|------------------------------------------------------------------------------------------------------------|----|
| Definitions                                                                                                | 3  |
| Standardized Mortality Ratio (SMR)                                                                         |    |
| Calculation of Usage of PH Medication                                                                      |    |
| Table S1: Among patients with PH, codes used to describe their comorbidities                               | 4  |
| Figure S1: Multiple etiologies of Pulmonary Hypertension                                                   | 5  |
| Table S2: Comorbidities of Pulmonary Hypertension Patients by WHO Group Classification                     | 6  |
| Table S3: Prevalence of PH in Adults with Comorbid Conditions                                              | 7  |
| Table S4: Trend Analysis of Incidence Rates (2003-2012)                                                    | 8  |
| Figure S2: Incidence rates of Pulmonary Hypertension per 100,000 persons by year (by gender)               | 9  |
| Table S5: Crude Mortality Rate (per 100) by Group of PH and by Age group                                   | 10 |
| Figure S3: Crude 1 year mortality rate by calendar year for patients with Pediatric Pulmonary Hypertension | 12 |
| Table S6: Description of Group 2/3 adult PH Patients with/without Combination Diagnoses (Group 2+3)        | 13 |
| Table S7: Standardized Mortality Ratios (2003/2011) for Group 2/3 adult PH patients                        | 14 |
| Figure S4: Survival of Group 2/3 adult PH patients with/without combination diagnoses                      | 15 |

### **Standardized Mortality Ratio (SMR)**

To determine the impact of PH on mortality we calculated a gender and age-adjusted Standardized Mortality Ratios (SMRs) for two years of our study, 2003 and 2011 using the 2007 Canadian population as the standard population, as described below and in. For PH patients diagnosed in 2003, the observed number of deaths occurring in the 12 months following diagnosis was determined by gender and age. The expected number of deaths in each gender-age category was estimated by multiplying the number of PH patients in each gender-age category in 2003 by the death rate for the respective gender-age category, The observed number of deaths for 2003 was then summed across gender-age categories and then divided by the sum of the expected number of deaths to determine the SMR. The 95% confidence interval for the SMR was calculated using the gamma distribution. This same approach was used for PH cases diagnosed in 2011 and for WHO PH groups.

### **Calculation of Usage of PH Medication:**

Medications were considered to be taken in combination if their prescription start and end dates (calculated by adding the number of days supplied to the start date) overlapped by  $\geq 7$  days. For medication combinations the number of total days supplied was calculated by adding the number of overlapping days in the prescriptions of the two combined medications. The total number of days supplied by calendar year was also determined.

**Table S1: Among patients with PH, codes used to describe their comorbidities**

| <b>Group</b> | <b>ICD-9</b>                                                                                                                                                                                               | <b>ICD-10</b>                                                                                                                                                                   | <b>OHIP</b>                                 |
|--------------|------------------------------------------------------------------------------------------------------------------------------------------------------------------------------------------------------------|---------------------------------------------------------------------------------------------------------------------------------------------------------------------------------|---------------------------------------------|
| Group 1      | 4160, 695.4, 710.0, 710.1, 710.2, 710.3, 710.4, 710.8, 710.9, 714.0, 042, 043, 044, 572.3, 571.2, 571.5, 571.6, 746.84, 746.89, 746.9, V136, 745.4, 745.5, 745.9, 74710, 74711, 74720, 74721, 74722, 74729 | I27.0, M32, M33, M34, M35, M05, J99.0, J99.1, B24, K70-K77, Q21, Q25.0, B65                                                                                                     | 710, 714, 042, 043, 044, 571, 745, 746, 747 |
| Group 2      | 428.0, 428.1, 428.9, 394.0, 394.1, 394.2, 394.9, 396.0, 396.1, 396.2, 396.3, 396.8, 396.9, 424.0, 746.5, 746.6, 395.0, 395.1, 395.2, 395.9, 424.1, 746.3, 746.4, 425                                       | I50, Q23, I05, I06, I08.0, I34, I35, I39.0, I39.1, I25.5, I25.6, I25.8, I25.9, O99.4, O90.3, I42.0, I42.1, I42.2, I42.5, I42.6, I42.7, I42.8, I42.9, I43.0, I43.1, I43.2, I43.8 | -                                           |
| Group 3      | 492.0, 492.8, 518.1, 277.00, 277.01, 518.2, 490, 491.0, 491.1, 491.2, 491.8, 491.9, 496, 5163, 18.1, 500, 502, 503, 505, 515, 748.5, 551.3, 552.3, 553.3, 780.51, 780.53                                   | J40-J44, E84, J60-J70, J82, J84, P27.1, Q79.0, G47.30, G47.31, G47.38, I26, I80.2, 180.3, 182.2                                                                                 | -                                           |
| Group 4      | 415.1, 673.80, 673.81, 673.82, 673.83, 673.84, 453.2, 453.8, 453.9                                                                                                                                         | I26, I80.2, I80.3, I82.2                                                                                                                                                        | -                                           |

All PH patients

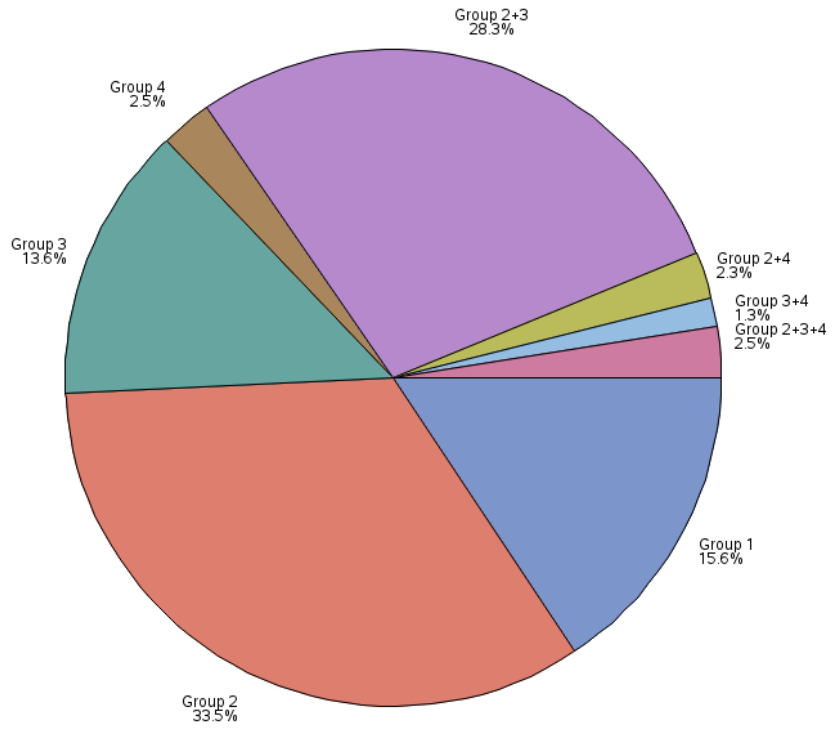

Patients ≥ 16 years

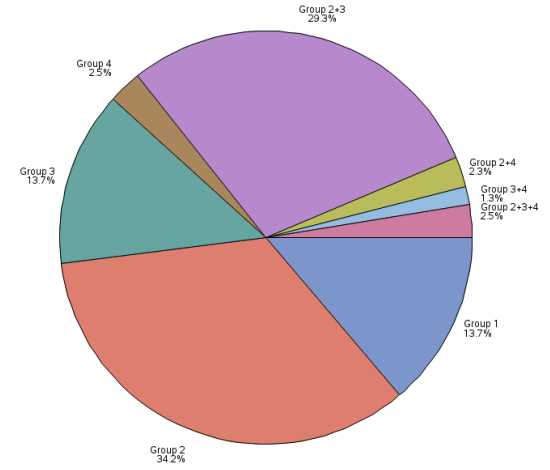

Patients <16 years

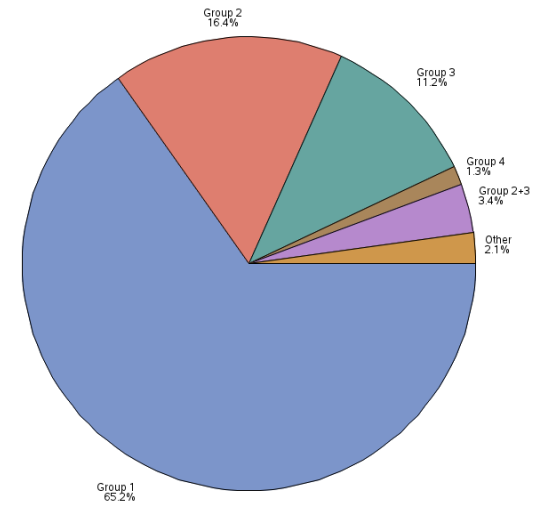

Figure S1: Multiple etiologies of Pulmonary Hypertension

**Table S2: Comorbidities of Pulmonary Hypertension Patients by WHO Group Classification**

|                                            | <16 years | >= 16 years | Total      |
|--------------------------------------------|-----------|-------------|------------|
| <b>All Group 1*</b>                        | N = 1,198 | N = 6,705   | N = 7,903  |
| Idiopathic PH (%)                          | 78.6      | 50.4        | 54.7       |
| Connective Tissue Diseases (%)             | 0.0       | 6.4         | 5.4        |
| Congenital Heart Diseases (%)              | 41.8      | 6.1         | 11.5       |
| <b>All Group 2 (Left Heart Disease) *</b>  | N = 394   | N = 33,374  | N = 33,768 |
| Diastolic/Systolic Dysfunction (%)         | 67.5      | 86.8        | 86.5       |
| Mitral/Aortic Valve Disease (%)            | 43.9      | 37.1        | 37.2       |
| Cardiomyopathy (%)                         | 9.6       | 16.5        | 16.4       |
| <b>All Group 3 (Lung Disease/Hypoxia)*</b> | N = 295   | N = 22,894  | N = 23,189 |
| COPD (%)                                   | 12.9      | 83.0        | 82.1       |
| Interstitial Lung Disease (%)              | 81.4      | 24.2        | 24.9       |
| Sleep-Disordered Breathing (%)             | 12.5      | 10.1        | 10.1       |
| <b>Group 4: CTEPH</b>                      | N = 65    | N = 4,360   | N = 4,425  |

\* = denominator within each group

Abbreviations: PH- pulmonary hypertension; COPD – Chronic Obstructive Pulmonary Disease CTEPH- Chronic Thromboembolic Pulmonary Hypertension

**Table S3: Prevalence of PH in Adults with Comorbid Conditions**

| Comorbid Conditions                   | 2002                             |                  | 2012                             |                  |
|---------------------------------------|----------------------------------|------------------|----------------------------------|------------------|
|                                       | Prevalence in General Population | Prevalence of PH | Prevalence in General Population | Prevalence of PH |
|                                       | Number (%)*                      | Number (%)*      | Number (%)*                      | Number (%)*      |
| <b>Left Heart Disease</b>             | 212,675 (1.9%)                   | 12,763 (6.0%)    | 246,852 (2.2%)                   | 8,805 (3.6%)     |
| <b>Diastolic/Systolic Dysfunction</b> | 167,068 (1.5%)                   | 10,839 (6.5%)    | 152,906 (1.4%)                   | 6,760 (4.4%)     |
| <b>Mitral/Aortic Valve Disease</b>    | 69,739 (0.6%)                    | 5,354 (7.7%)     | 78,760 (0.7%)                    | 4,008 (5.1%)     |
| <b>Cardiomyopathy</b>                 | 51,659 (0.5%)                    | 2,347 (4.5%)     | 74,892 (0.7%)                    | 1,669 (2.2%)     |
| <b>Lung disease/Hypoxia</b>           | 367,866 (3.3%)                   | 8,693 (2.4%)     | 663,855 (6.0%)                   | 4,691 (0.7%)     |
| <b>COPD</b>                           | 248,046 (2.2%)                   | 7,496 (3.0%)     | 513,503 (4.6%)                   | 3,613 (0.7%)     |
| <b>Interstitial Lung Disease</b>      | 157,663 (1.4%)                   | 1,945 (1.2%)     | 131,360 (1.2%)                   | 0,874 (0.7%)     |
| <b>Thromboembolic disease</b>         | 56,343 (0.5%)                    | 1,576 (2.8%)     | 112,880 (1.0%)                   | 1,557 (1.4%)     |

\* The % under the column “Prevalence in General Population” refers to the % of patients with the diagnosis of interest among the population in Ontario ≥16 years of age. The % under column “Prevalence of PH” refers to the % of patients with PH among those who have the diagnosis of interest.

Abbreviations: PH- pulmonary hypertension; COPD – Chronic Obstructive Pulmonary Disease

**Note** - For each group, % PH cohorts were compared between 2002 and 2012. All comparisons showed a statistically significant change in the percentage of PH cohorts between years (p <0.001)

**Table S4: Trend Analysis of Incidence Rates (2003-2012)**

|              | PH Group      |         |               |         |               |         |               |         |               |         |
|--------------|---------------|---------|---------------|---------|---------------|---------|---------------|---------|---------------|---------|
|              | All           |         | 1             |         | 2             |         | 3             |         | 4             |         |
| Group        | Mean Estimate | P-Value |
| All Patients | 1.029         | <.0001  | 1.037         | 0.0014  | 1.030         | <.0001  | 1.021         | 0.0011  | 1.086         | <.0001  |
| Adults       | 1.025         | <.0001  | 1.035         | 0.0022  | 1.027         | 0.0001  | 1.017         | 0.0025  | 1.083         | <.0001  |
| Pediatrics   | 1.041         | 0.0329  | 1.031         | 0.1996  | 1.051         | 0.0896  | 1.054         | 0.0904  | 1.078         | 0.2154  |
| Females      | 1.030         | 0.0001  | 1.038         | 0.0036  | 1.031         | 0.0003  | 1.024         | 0.0023  | 1.086         | 0.0002  |
| Males        | 1.027         | 0.0004  | 1.035         | 0.0141  | 1.029         | 0.0005  | 1.017         | 0.0118  | 1.087         | 0.0004  |

Mean Estimate = average change in incidence between 2003-2012 (e.g. a mean estimate of 1.026 means the average increase in incidence between 2003-2012 was 2.6%)

Trend analysis was done using general additive model



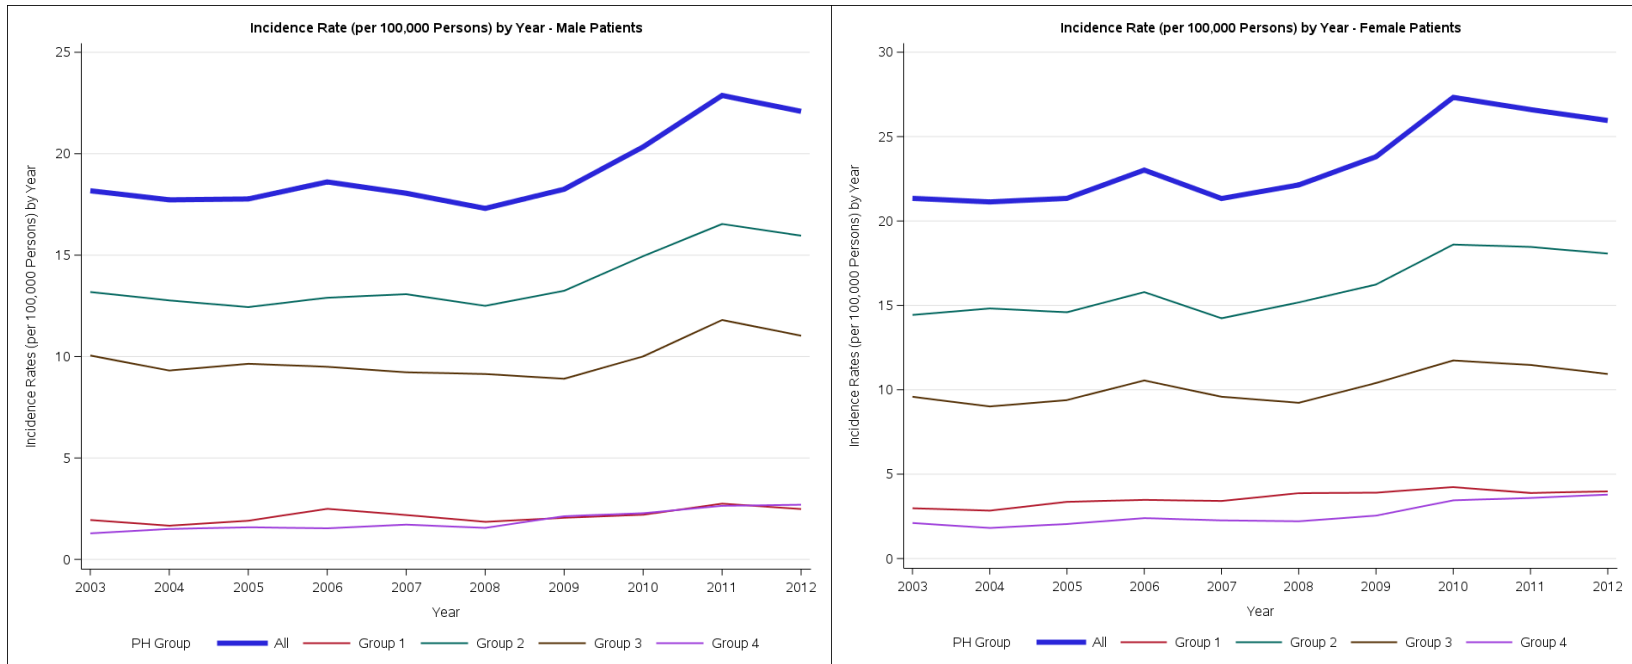

**Figure S2: Incident rates of Pulmonary Hypertension per 100,000 persons by year (by gender)**

**Table S5: Crude Mortality Rate (per 100) by Group of PH and by Age group**

| <b>All PH patients</b>        |               |          |          |          |          |               |          |          |          |          |               |          |          |          |          |
|-------------------------------|---------------|----------|----------|----------|----------|---------------|----------|----------|----------|----------|---------------|----------|----------|----------|----------|
| <b>Year</b>                   | <b>30 Day</b> |          |          |          |          | <b>1 Year</b> |          |          |          |          | <b>5 Year</b> |          |          |          |          |
|                               | <b>All</b>    | <b>1</b> | <b>2</b> | <b>3</b> | <b>4</b> | <b>All</b>    | <b>1</b> | <b>2</b> | <b>3</b> | <b>4</b> | <b>All</b>    | <b>1</b> | <b>2</b> | <b>3</b> | <b>4</b> |
| <b>2003</b>                   | 14.0          | 13.4     | 13.7     | 15.5     | 11.9     | 35.9          | 23.0     | 38.0     | 41.9     | 36.2     | 64.2          | 44.9     | 67.7     | 74.9     | 59.5     |
| <b>2004</b>                   | 11.4          | 8.2      | 11.4     | 13.4     | 10.6     | 33.5          | 21.3     | 35.2     | 39.8     | 30.0     | 63.1          | 48.2     | 65.2     | 74.3     | 57       |
| <b>2005</b>                   | 13.7          | 10.8     | 14.2     | 15.2     | 11.8     | 35.1          | 24.0     | 36.9     | 40.1     | 31.9     | 65.1          | 42.6     | 68.9     | 75.9     | 61.6     |
| <b>2006</b>                   | 12.4          | 7.1      | 12.8     | 14.8     | 20.7     | 35.5          | 21.0     | 37.9     | 42.0     | 44.2     | 64.4          | 42.0     | 68.7     | 73.5     | 69.7     |
| <b>2007</b>                   | 13.7          | 9.4      | 14.0     | 17.3     | 16.4     | 36.9          | 26.6     | 39.1     | 42.9     | 34.4     | 64.0          | 47.6     | 67.7     | 74.6     | 62.5     |
| <b>2008</b>                   | 13.5          | 8.6      | 14.5     | 16.4     | 16.3     | 38.2          | 25.1     | 41.4     | 46.1     | 41.2     | 65.7          | 49.2     | 69.4     | 75.8     | 62.9     |
| <b>2009</b>                   | 12.7          | 7.6      | 13.5     | 16.2     | 14.3     | 35.0          | 21.4     | 38.6     | 41.3     | 36.5     | 64.0          | 41.7     | 68.9     | 74.4     | 63.2     |
| <b>2010</b>                   | 12.8          | 6.5      | 13.9     | 15.8     | 12.6     | 37.2          | 22.8     | 40.8     | 44.1     | 36.7     | 63.5          | 44.5     | 68.1     | 72.6     | 61.2     |
| <b>2011</b>                   | 11.7          | 6.3      | 12.8     | 13.6     | 14.1     | 34.2          | 17.3     | 37.8     | 40.2     | 36.4     | 55.2          | 32.8     | 59.7     | 64.4     | 56.9     |
| <b>2012</b>                   | 12.8          | 7.3      | 13.7     | 16.3     | 14.8     | 37.4          | 22.8     | 40.9     | 46.0     | 40.8     | 50.1          | 30.6     | 54.8     | 59.6     | 50.8     |
| <b>Overall</b>                | 12.8          | 8.3      | 13.4     | 15.4     | 14.4     | 35.9          | 22.4     | 38.8     | 42.5     | 37.2     | 61.5          | 41.9     | 65.5     | 71.5     | 59.8     |
| <b>Patients ≥ 16 years</b>    |               |          |          |          |          |               |          |          |          |          |               |          |          |          |          |
| <b>Year</b>                   | <b>30 Day</b> |          |          |          |          | <b>1 Year</b> |          |          |          |          | <b>5 Year</b> |          |          |          |          |
|                               | <b>All</b>    | <b>1</b> | <b>2</b> | <b>3</b> | <b>4</b> | <b>All</b>    | <b>1</b> | <b>2</b> | <b>3</b> | <b>4</b> | <b>All</b>    | <b>1</b> | <b>2</b> | <b>3</b> | <b>4</b> |
| <b>2003</b>                   | 14.1          | 14.1     | 13.7     | 15.6     | 12.3     | 36.7          | 24.5     | 38.3     | 42.2     | 37.3     | 65.6          | 48.7     | 68.3     | 75.7     | 61.3     |
| <b>2004</b>                   | 11.5          | 8.2      | 11.5     | 13.6     | 10.7     | 33.9          | 21.9     | 35.5     | 40.2     | 30.1     | 63.9          | 49.4     | 65.7     | 75.0     | 57.3     |
| <b>2005</b>                   | 13.7          | 11.0     | 14.2     | 15.3     | 11.9     | 35.4          | 24.4     | 37.0     | 40.4     | 32.2     | 65.9          | 43.8     | 69.2     | 76.5     | 62.1     |
| <b>2006</b>                   | 12.4          | 7.0      | 12.8     | 14.8     | 21.0     | 35.7          | 20.9     | 37.9     | 42.1     | 44.8     | 65.1          | 42.9     | 68.9     | 74.2     | 70.2     |
| <b>2007</b>                   | 13.9          | 9.7      | 14.2     | 17.5     | 16.5     | 37.4          | 27.4     | 39.5     | 43.4     | 34.6     | 65.0          | 49.9     | 68.3     | 75.4     | 63.0     |
| <b>2008</b>                   | 13.7          | 8.7      | 14.6     | 16.5     | 16.6     | 38.6          | 25.8     | 41.6     | 46.2     | 41.5     | 66.5          | 50.8     | 69.9     | 76.1     | 63.5     |
| <b>2009</b>                   | 13.0          | 8.1      | 13.6     | 16.3     | 14.7     | 35.6          | 22.9     | 38.8     | 41.7     | 37.1     | 65.3          | 45.0     | 69.5     | 75.2     | 64.5     |
| <b>2010</b>                   | 12.9          | 6.7      | 13.9     | 15.9     | 12.5     | 37.6          | 22.9     | 41.0     | 44.5     | 37.0     | 64.4          | 46.1     | 68.6     | 73.3     | 61.4     |
| <b>2011</b>                   | 11.8          | 6.1      | 12.9     | 13.7     | 14.3     | 34.4          | 16.8     | 37.9     | 40.4     | 36.7     | 55.9          | 33.4     | 60.0     | 64.9     | 57.5     |
| <b>2012</b>                   | 12.9          | 7.1      | 13.9     | 16.5     | 14.7     | 37.9          | 22.9     | 41.3     | 46.7     | 40.6     | 50.8          | 31.0     | 55.2     | 60.4     | 50.7     |
| <b>Overall</b>                | 13.0          | 8.4      | 13.5     | 15.6     | 14.5     | 36.4          | 22.9     | 39.0     | 42.8     | 37.5     | 62.4          | 43.5     | 66.0     | 72.2     | 60.4     |
| <b>Patients &lt; 16 years</b> |               |          |          |          |          |               |          |          |          |          |               |          |          |          |          |
| <b>Year</b>                   | <b>30 Day</b> |          |          |          |          | <b>1 Year</b> |          |          |          |          | <b>5 Year</b> |          |          |          |          |
|                               | <b>All</b>    | <b>1</b> | <b>2</b> | <b>3</b> | <b>4</b> | <b>All</b>    | <b>1</b> | <b>2</b> | <b>3</b> | <b>4</b> | <b>All</b>    | <b>1</b> | <b>2</b> | <b>3</b> | <b>4</b> |
| <b>2003</b>                   | 8.6           | 8.3      | 10.5     | 11.1     | 0        | 11.4          | 11.1     | 10.5     | 16.7     | 0        | 15.7          | 16.7     | 10.5     | 22.2     | 0        |
| <b>2004</b>                   | 4.4           | 7.7      | 4.5      | 0        | 0        | 11.1          | 7.7      | 18.2     | 7.1      | 0        | 22.2          | 23.1     | 22.7     | 21.4     | 0        |

|                |      |      |      |      |      |      |      |      |      |      |      |      |      |      |      |
|----------------|------|------|------|------|------|------|------|------|------|------|------|------|------|------|------|
| <b>2005</b>    | 9.1  | 8.0  | 10.0 | 7.7  | 0    | 18.2 | 20.0 | 20.0 | 7.7  | 0    | 25.0 | 28.0 | 20.0 | 15.4 | 0    |
| <b>2006</b>    | 10.9 | 9.1  | 16.7 | 14.3 | 0    | 27.3 | 22.7 | 38.9 | 33.3 | 0    | 30.9 | 27.3 | 44.4 | 33.3 | 33.3 |
| <b>2007</b>    | 3.2  | 4.5  | 0    | 4.5  | 0    | 15.9 | 13.6 | 16   | 18.2 | 0    | 22.2 | 13.6 | 28.0 | 31.8 | 0    |
| <b>2008</b>    | 4.8  | 5.6  | 5.3  | 0    | 0    | 11.9 | 11.1 | 15.8 | 14.3 | 25   | 19.0 | 16.7 | 21.1 | 28.6 | 25.0 |
| <b>2009</b>    | 4.1  | 2.9  | 4.5  | 5.6  | 0    | 13.5 | 5.7  | 22.7 | 16.7 | 12.5 | 16.2 | 8.6  | 22.7 | 22.2 | 12.5 |
| <b>2010</b>    | 6.2  | 3.6  | 8.3  | 10.5 | 20.0 | 16.9 | 21.4 | 16.7 | 10.5 | 20.0 | 20.0 | 21.4 | 20.8 | 15.8 | 40.0 |
| <b>2011</b>    | 6.7  | 8.6  | 4.3  | 4.5  | 0    | 24   | 22.9 | 26.1 | 27.3 | 16.7 | 25.3 | 25.7 | 26.1 | 27.3 | 16.7 |
| <b>2012</b>    | 6.8  | 10.7 | 3.6  | 7.4  | 20.0 | 16.2 | 21.4 | 14.3 | 11.1 | 60.0 | 20.3 | 25.0 | 21.4 | 14.8 | 60.0 |
| <b>Overall</b> | 6.4  | 6.9  | 6.2  | 7.2  | 4.8  | 16.8 | 16.0 | 19.5 | 17.1 | 16.7 | 21.4 | 20.2 | 23.8 | 23.2 | 21.4 |

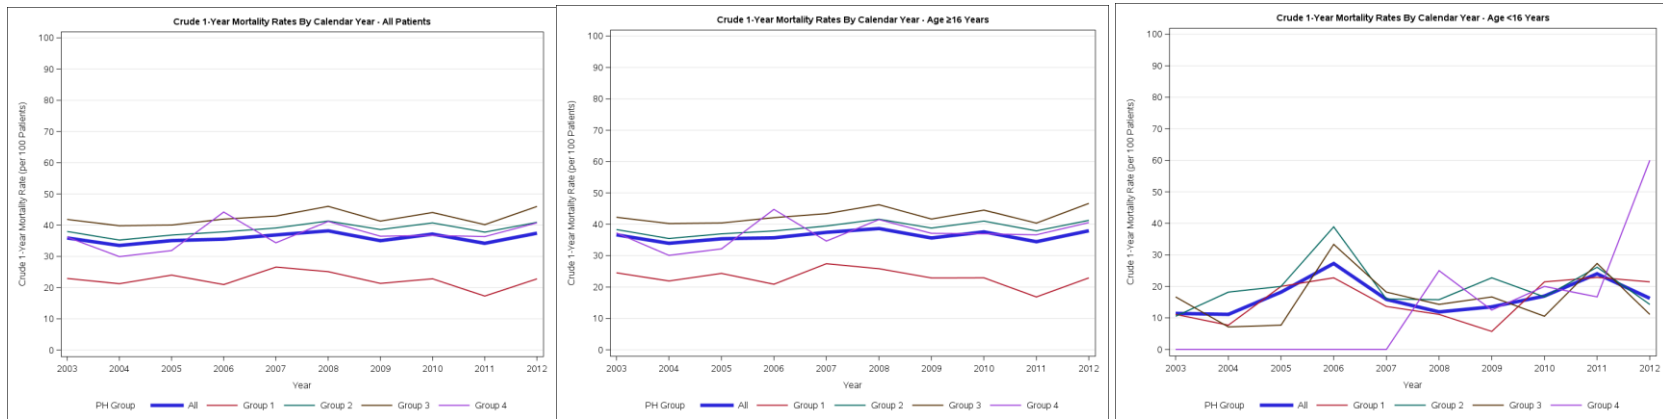

**Figure S3: Crude 1 year mortality rate by calendar year for patients with Pulmonary Hypertension**

**Table S6: Description of Group 2/3 adult PH Patients with/without Combination Diagnoses (Group 2+3)**

|                              | <b>Group 2</b> | <b>Group 3</b> | <b>Group 2+3</b> | <b>p value</b> |
|------------------------------|----------------|----------------|------------------|----------------|
|                              | N = 9,956      | N = 3,641      | N = 9,155        |                |
| Female Gender (%)            | 58.2%          | 53.4%          | 51.1%            | <0.001         |
| Mean age at index date* (SD) | 73.7 (14.0)    | 69.3 (13.2)    | 74.4 (11.6)      | <0.001         |
| Mean total ADG Score (SD)    | 14.6 (4.0)     | 15.0 (3.9)     | 16.1 (3.8)       | <0.001         |
| Mean major ADG Score (SD)    | 3.8 (1.5)      | 3.8 (1.5)      | 4.2 (1.5)        | <0.001         |

Abbreviations: PH- pulmonary hypertension; SD- standard deviation; ADG- the Johns Hopkins Aggregated Diagnosis Groups  
Statistical comparisons conducted using one way ANOVA test

**Table S7: Standardized Mortality Ratios (2003/2011) for Group 2/3 adult PH patients with/without combination diagnoses (Group 2+3)**

| <b>Year</b> | <b>Group</b> | <b>SMR</b> | <b>95% Confidence Interval</b> |
|-------------|--------------|------------|--------------------------------|
| 2003        | Group 2      | 8.4        | (7.4, 9.4)                     |
|             | Group 3      | 13.3       | (11.2, 15.5)                   |
|             | Group 2+3    | 10.4       | (9.3, 11.5)                    |
| 2011        | Group 2      | 5.9        | (5.3, 6.5)                     |
|             | Group 3      | 10.5       | (8.8, 12.1)                    |
|             | Group 2+3    | 8.5        | (7.8, 9.3)                     |

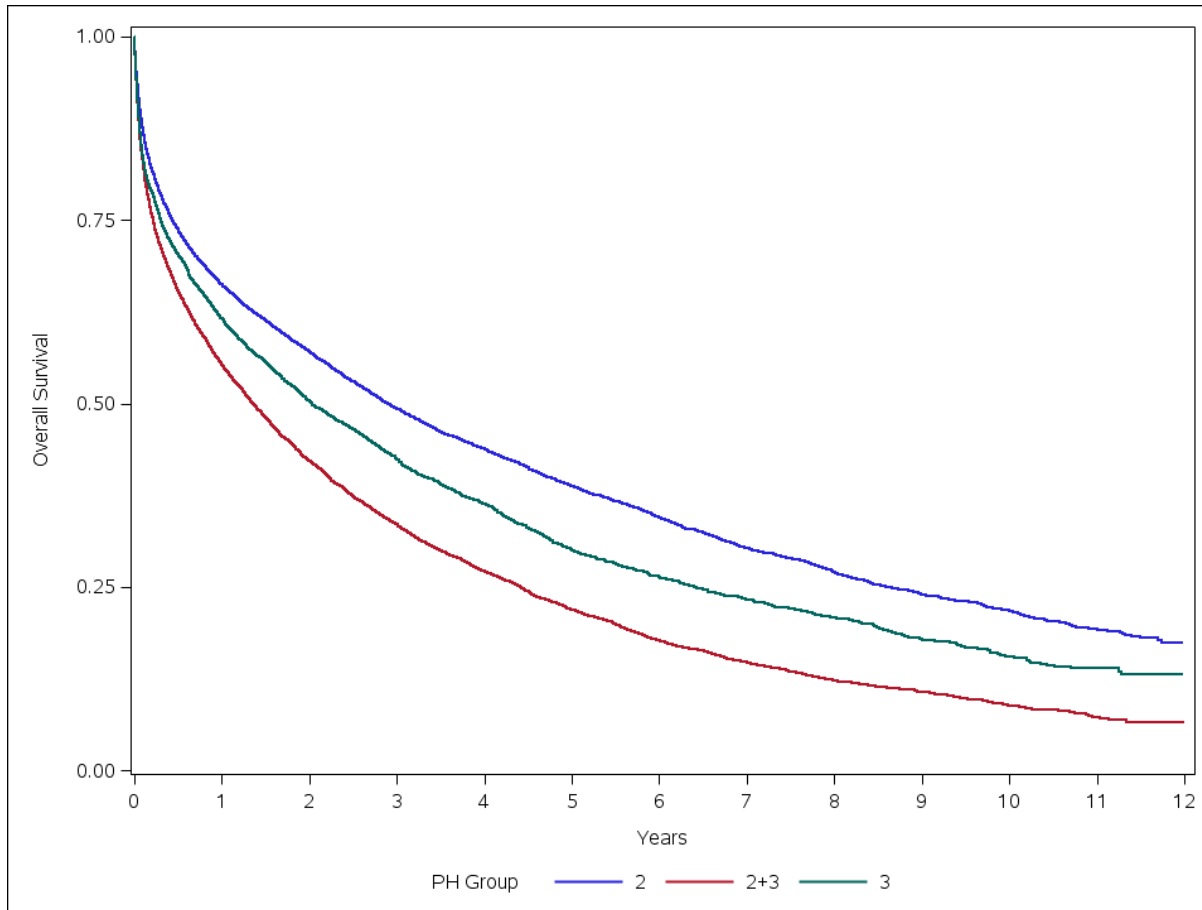

**Figure S4: Survival of Group 2/3 adult PH patients with/without combination diagnoses**
